# Supplementary material
Source: MDPI journal article supplement (https://www.mdpi.com/2673-6284/11/2/10)
Supplement: s1 [file s1]

# Immobilization and Characterization of L-Asparaginase over Carbon Xerogels

Rita A. M. Barros<sup>1,2,†</sup>, Raquel O. Cristóvão<sup>1,2,†</sup>, Sónia A. C. Carabineiro<sup>1,3</sup>, Márcia C. Neves<sup>4</sup>, Mara G. Freire<sup>4</sup>, Joaquim L. Faria<sup>1,2</sup>, Valéria C. Santos-Ebinuma<sup>5</sup>, Ana P. M. Tavares<sup>4,\*</sup> and Cláudia G. Silva<sup>1,2,\*</sup>

<sup>1</sup> LSRE-LCM - Laboratory of Separation and Reaction Engineering – Laboratory of Catalysis and Materials, Faculty of Engineering, University of Porto, Rua Dr. Roberto Frias, 4200-465 Porto, Portugal;

<sup>2</sup> ALiCE – Associate Laboratory in Chemical Engineering, Faculty of Engineering, University of Porto, Rua Dr. Roberto Frias, 4200-465 Porto, Portugal;

<sup>3</sup> LAQV-REQUIMTE, Department of Chemistry, NOVA School of Science and Technology, Universidade NOVA de Lisboa, 2829-516 Caparica, Portugal;

<sup>4</sup> CICECO-Aveiro Institute of Materials, Department of Chemistry, University of Aveiro, 3810-193 Aveiro, Portugal;

<sup>5</sup> Department of Engineering Bioprocess and Biotechnology, School of Pharmaceutical Sciences, UNESP-University Estadual Paulista, Araraquara, Brazil;

\* Correspondence: C. G. S: cgsilva@fe.up.pt; Tel.: +351 220 414 874; A. P. M. T: aptavares@ua.pt; Tel.: +351 234 401 520

† These authors contributed equally to this work.

## Model Equations:

$$Y(CX - 4) = -363.27 + 0.17X_1 + 119.92X_2 + 447.25X_3 + 0.11X_1X_2 - 0.83X_1X_3 + 57.71X_2X_3 - 0.01X_1^2 - 10.47X_2^2 - 1501.96X_3^2 \quad (S1)$$

$$Y(CX - 13) = -440.42 + 2.56X_1 + 111.42X_2 + 922.57X_3 - 0.36X_1X_2 - 3.94X_1X_3 + 41.98X_2X_3 - 7.46X_2^2 - 1790.42X_3^2 \quad (S2)$$

$$Y(CX - 30) = 110.83 - 4.80X_1 + 20.78X_2 + 573.48X_3 - 0.24X_1X_2 - 0.17X_1X_3 + 43.50X_2X_3 - 3.60X_2^2 - 1564.96X_3^2 \quad (S3)$$

**Table S1.** Factor levels for a central composite design to evaluate the ASNase immobilization over CX.

| Factors | Parameters                                  | Coded level |      |      |      |       |
|---------|---------------------------------------------|-------------|------|------|------|-------|
|         |                                             | -1.68       | -1   | 0    | +1   | +1.68 |
| $X_1$   | Time (min)                                  | 9.6         | 30.0 | 60.0 | 90.0 | 110.4 |
| $X_2$   | pH                                          | 4.32        | 5.00 | 6.00 | 7.00 | 7.68  |
| $X_3$   | ASNase Concentration (mg·mL <sup>-1</sup> ) | 0.02        | 0.09 | 0.20 | 0.31 | 0.38  |

**Table S2.** Central composite experimental design plan.

| Run | $X_1$ | $X_2$ | $X_3$ |
|-----|-------|-------|-------|
| 1   | -1    | -1    | -1    |
| 2   | 1     | -1    | -1    |
| 3   | -1    | 1     | -1    |
| 4   | 1     | 1     | -1    |
| 5   | -1    | -1    | 1     |
| 6   | 1     | -1    | 1     |
| 7   | -1    | 1     | 1     |
| 8   | 1     | 1     | 1     |

|    |       |       |       |
|----|-------|-------|-------|
| 9  | -1.68 | 0     | 0     |
| 10 | 1.68  | 0     | 0     |
| 11 | 0     | -1.68 | 0     |
| 12 | 0     | 1.68  | 0     |
| 13 | 0     | 0     | -1.68 |
| 14 | 0     | 0     | 1.68  |
| 15 | 0     | 0     | 0     |
| 16 | 0     | 0     | 0     |
| 17 | 0     | 0     | 0     |
| 18 | 0     | 0     | 0     |
| 19 | 0     | 0     | 0     |

**Table S3.** Central Composite design matrix with the experimental data (Exp.) and predicted (Pred.) values of *RRA* obtained after ASNase immobilization onto CX-4, CX-13 and CX-30, as a function of the coded factors  $X_1$ ,  $X_2$ ,  $X_3$ , respectively time (min), pH and enzyme concentration ( $\text{mg}\cdot\text{mL}^{-1}$ ).

| Run | $X_1$<br>(min) | $X_2$ | $X_3$<br>( $\text{mg}\cdot\text{mL}^{-1}$ ) | Relative Recovered Activity (%) |       |       |       |       |       |
|-----|----------------|-------|---------------------------------------------|---------------------------------|-------|-------|-------|-------|-------|
|     |                |       |                                             | CX-4                            |       | CX-13 |       | CX-30 |       |
|     |                |       |                                             | Exp.                            | Pred. | Exp.  | Pred. | Exp.  | Pred. |
| 1   | 30.0           | 5.00  | 0.09                                        | 43.0                            | 42.1  | 33.3  | 29.6  | 70.0  | 96.9  |
| 2   | 90.0           | 5.00  | 0.09                                        | 42.4                            | 29.3  | 47.9  | 55.3  | 74.1  | 45.9  |
| 3   | 30.0           | 7.00  | 0.09                                        | 51.2                            | 48.0  | 49.5  | 59.3  | 52.6  | 74.6  |
| 4   | 90.0           | 7.00  | 0.09                                        | 52.3                            | 48.9  | 41.3  | 41.5  | 62.4  | 53.0  |
| 5   | 30.0           | 5.00  | 0.31                                        | 56.8                            | 66.3  | 83.7  | 95.2  | 110.9 | 134.3 |
| 6   | 90.0           | 5.00  | 0.31                                        | 33.3                            | 42.6  | 66.9  | 68.9  | 93.6  | 85.5  |
| 7   | 30.0           | 7.00  | 0.31                                        | 78.4                            | 97.6  | 139.0 | 143.3 | 89.0  | 131.2 |
| 8   | 90.0           | 7.00  | 0.31                                        | 80.6                            | 87.6  | 58.1  | 73.5  | 124.6 | 111.7 |
| 9   | 9.6            | 6.00  | 0.20                                        | 95.7                            | 84.0  | 126.4 | 119.0 | 242.2 | 180.8 |
| 10  | 110.4          | 6.00  | 0.20                                        | 61.9                            | 64.9  | 91.1  | 81.9  | 80.1  | 121.7 |
| 11  | 60.0           | 4.32  | 0.20                                        | 42.0                            | 42.1  | 68.9  | 64.3  | 83.6  | 82.0  |
| 12  | 60.0           | 7.68  | 0.20                                        | 93.5                            | 84.8  | 105.0 | 93.0  | 103.5 | 85.3  |
| 13  | 60.0           | 6.00  | 0.02                                        | 0.0                             | 15.3  | 0.0   | -2.5  | 0.0   | -0.01 |
| 14  | 60.0           | 6.00  | 0.38                                        | 91.9                            | 68.1  | 93.7  | 79.6  | 100.5 | 80.8  |
| 15  | 60.0           | 6.00  | 0.20                                        | 82.4                            | 93.0  | 94.6  | 99.7  | 110.5 | 93.8  |
| 16  | 60.0           | 6.00  | 0.20                                        | 91.8                            | 93.0  | 93.4  | 99.7  | 95.5  | 93.8  |
| 17  | 60.0           | 6.00  | 0.20                                        | 65.8                            | 93.0  | 110.8 | 99.7  | 91.3  | 93.8  |
| 18  | 60.0           | 6.00  | 0.20                                        | 140.3                           | 93.0  | 105.8 | 99.7  | 94.8  | 93.8  |
| 19  | 60.0           | 6.00  | 0.20                                        | 83.2                            | 93.0  | 90.9  | 99.7  | 73.5  | 93.8  |

$X_1$  – contact time (min);  $X_2$  – pH;  $X_3$  – ASNase concentration.

**Table S4.** Analysis of variance (ANOVA) for the fitted quadratic polynomial models of *RRA* values obtained after *ASNase* immobilization onto CX-4, CX-13 and CX-30.

| Source     | Sum of Squares (SS) |          |          | df | Mean Square (MS) |         |         | F-value |         |        | p-value       |               |               |
|------------|---------------------|----------|----------|----|------------------|---------|---------|---------|---------|--------|---------------|---------------|---------------|
|            | CX-4                | CX-13    | CX-30    |    | CX-4             | CX-13   | CX-30   | CX-4    | CX-13   | CX-30  | CX-4          | CX-13         | CX-30         |
| (1) X1 (L) | 440.36              | 1660.35  | 4224.52  | 1  | 440.36           | 1660.35 | 4224.52 | 0.7930  | 10.8903 | 3.2876 | 0.3964        | <b>0.0092</b> | 0.1032        |
| X1 (Q)     | 585.14              | 0.95     | 5634.08  | 1  | 585.14           | 0.95    | 5634.08 | 1.0538  | 0.0063  | 4.3845 | 0.3314        | 0.9387        | 0.0658        |
| (2) X2 (L) | 2208.20             | 1000.83  | 12.99    | 1  | 2208.20          | 1000.83 | 12.99   | 3.9768  | 6.5645  | 0.0101 | 0.0773        | <b>0.0306</b> | 0.9221        |
| X2 (Q)     | 1490.42             | 757.37   | 175.92   | 1  | 1490.42          | 757.37  | 175.92  | 2.6841  | 4.9676  | 0.1369 | 0.1358        | 0.0528        | 0.7199        |
| (3) X3 (L) | 3378.00             | 8133.37  | 7883.20  | 1  | 3378.00          | 8133.37 | 7883.20 | 6.0835  | 53.3469 | 6.1348 | <b>0.0358</b> | <b>0.0000</b> | <b>0.0352</b> |
| X3 (Q)     | 4494.57             | 6386.71  | 4879.48  | 1  | 4494.57          | 6386.71 | 4879.48 | 8.0943  | 41.8905 | 3.7973 | <b>0.0192</b> | <b>0.0001</b> | 0.0831        |
| 1L by 2L   | 93.67               | 944.35   | 428.50   | 1  | 93.67            | 944.35  | 428.50  | 0.1687  | 6.1940  | 0.3335 | 0.6909        | <b>0.0345</b> | 0.5778        |
| 1L by 3L   | 59.78               | 1351.57  | 2.42     | 1  | 59.78            | 1351.57 | 2.42    | 0.1077  | 8.8649  | 0.0019 | 0.7503        | <b>0.0155</b> | 0.9663        |
| 2L by 3L   | 322.41              | 170.59   | 183.18   | 1  | 322.41           | 170.59  | 183.18  | 0.5806  | 1.1189  | 0.1426 | 0.4656        | 0.3177        | 0.7145        |
| Error      | 4997.48             | 1372.16  | 11564.92 | 9  | 555.28           | 152.46  | 1284.99 |         |         |        |               |               |               |
| Total SS   | 16963.41            | 21500.03 | 36806.00 | 18 |                  |         |         |         |         |        |               |               |               |

CX-4:  $R^2 = 0.7054$ ; CX-13:  $R^2 = 0.93618$ ; CX-30:  $R^2 = 0.68579$ . X1: Time (min); X2: pH; X3: *ASNase* Concentration ( $\text{mg}\cdot\text{mL}^{-1}$ ). Df, degrees of freedom; L, linear; Q, quadratic

**Table S5.** Experimental and predicted relative recovered activity (*RRA*) and immobilization yield (*IY*) maximum values at critical process conditions for the *ASNase* immobilization onto carbon xerogels with different pore sizes, namely 4, 13 and 30 nm (CX-4, CX-13 and CX-30, respectively).

| Sample | Critical Value Conditions |      |                                                         | Predicted Values |               | Experimental Values |                |
|--------|---------------------------|------|---------------------------------------------------------|------------------|---------------|---------------------|----------------|
|        | Time (min)                | pH   | Enzyme Concentration ( $\text{mg}\cdot\text{mL}^{-1}$ ) | <i>RRA</i> (%)   | <i>IY</i> (%) | <i>RRA</i> (%)      | <i>IY</i> (%)  |
| CX-4   | 49.0                      | 6.73 | 0.26                                                    | 100              | 100           | $97 \pm 4$          | $99.2 \pm 0.4$ |
| CX-13  | 116                       | 5.18 | 0.19                                                    | 85               | 100           | $89 \pm 2$          | $99.9 \pm 0.1$ |
| CX-30  | 67.8                      | 6.90 | 0.28                                                    | 100              | 1.5           | $100 \pm 5$         | $0 \pm 8$      |

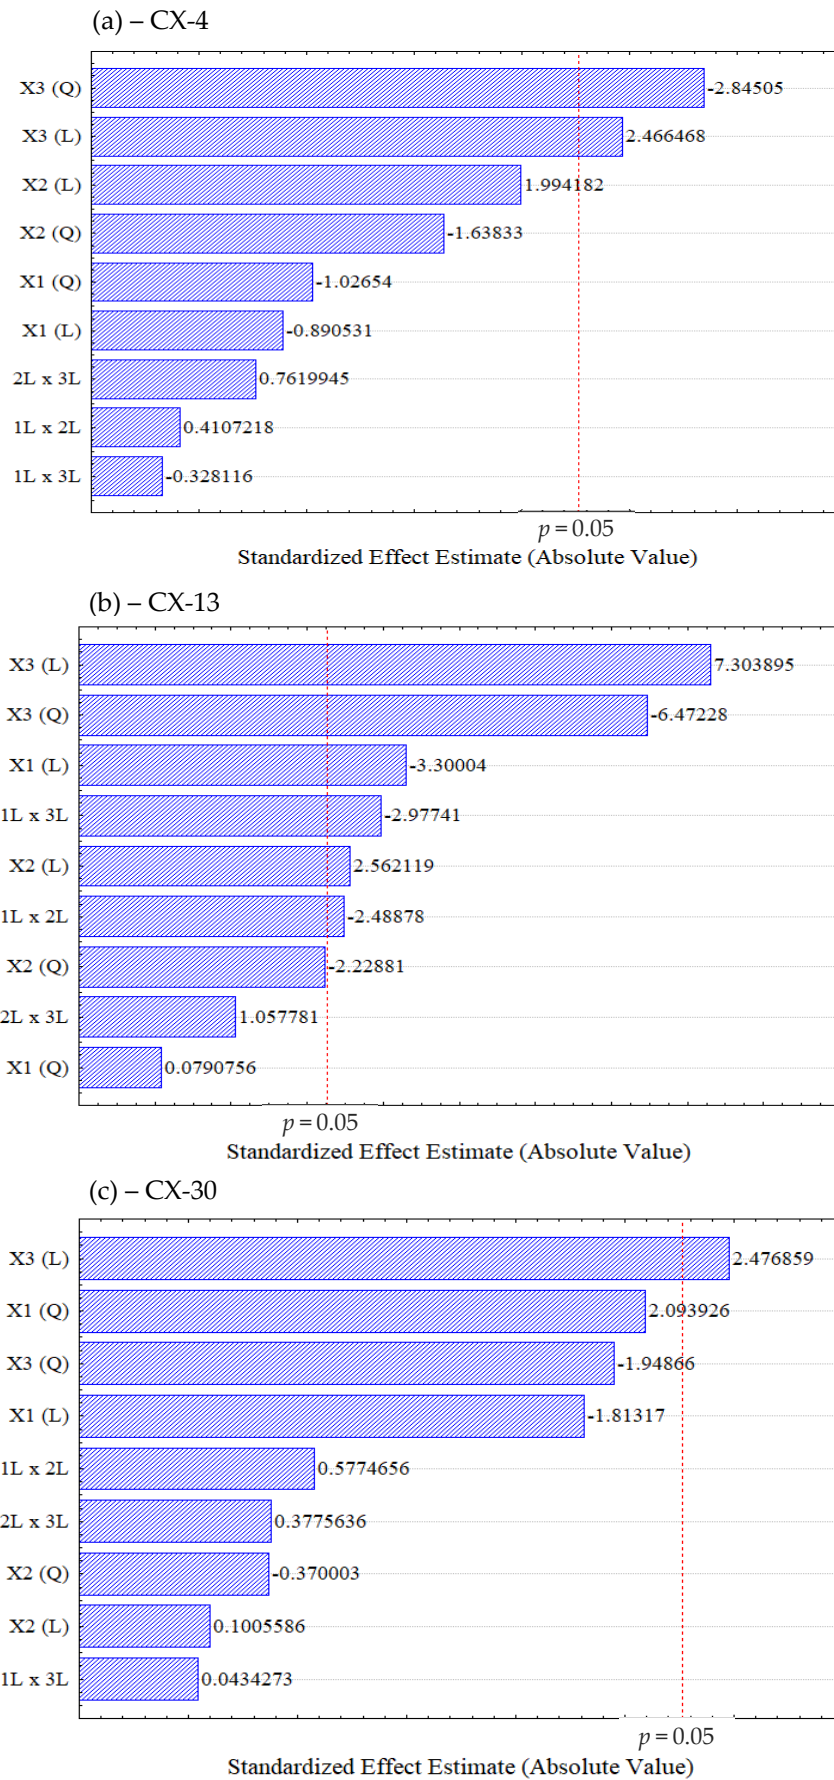

**Figure S1.** Pareto chart of standardized effects for the Central Composite design for ASNase immobilization onto (a) CX-4, (b) CX-13 and (c) CX-30. (1) time; (2) pH; (3) enzyme concentration.

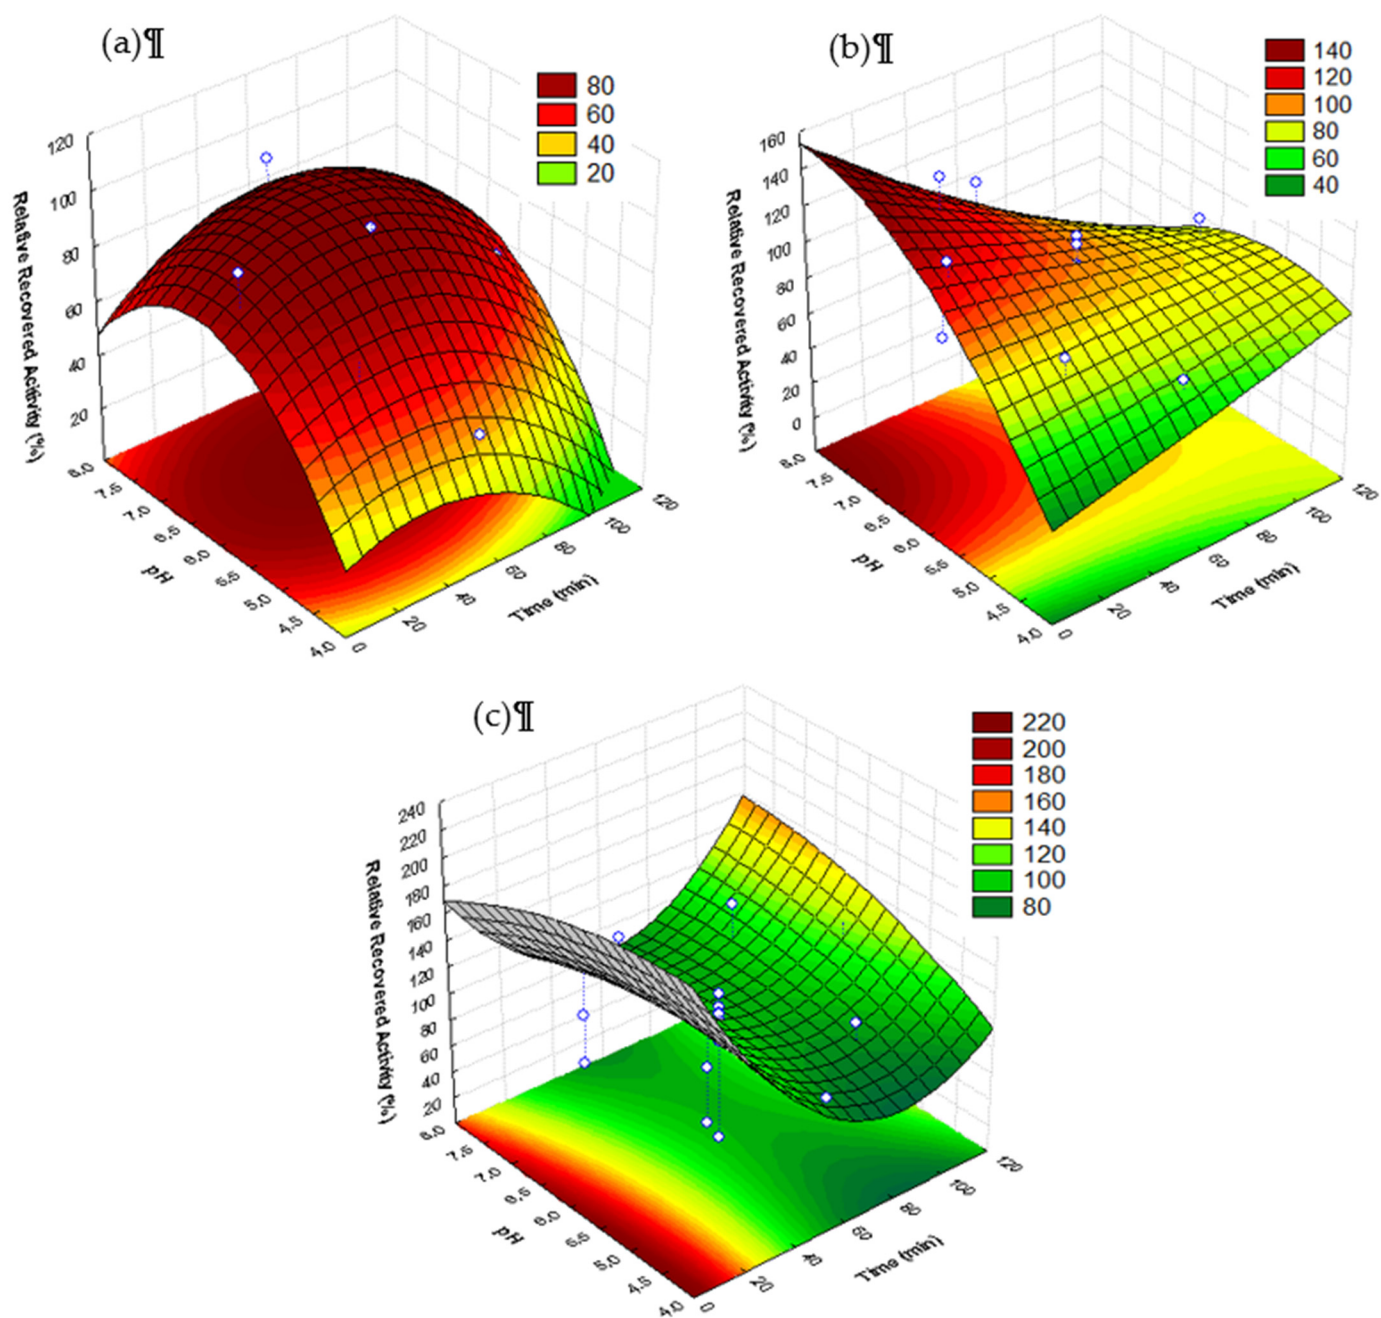

**Figure S2.** Response surface plots for RRA of immobilized ASNase over CX as a function of pH and time with an enzyme concentration of 0.2 mg·mL<sup>-1</sup>. (a) CX-4; (b) CX-13; (c) CX-30.

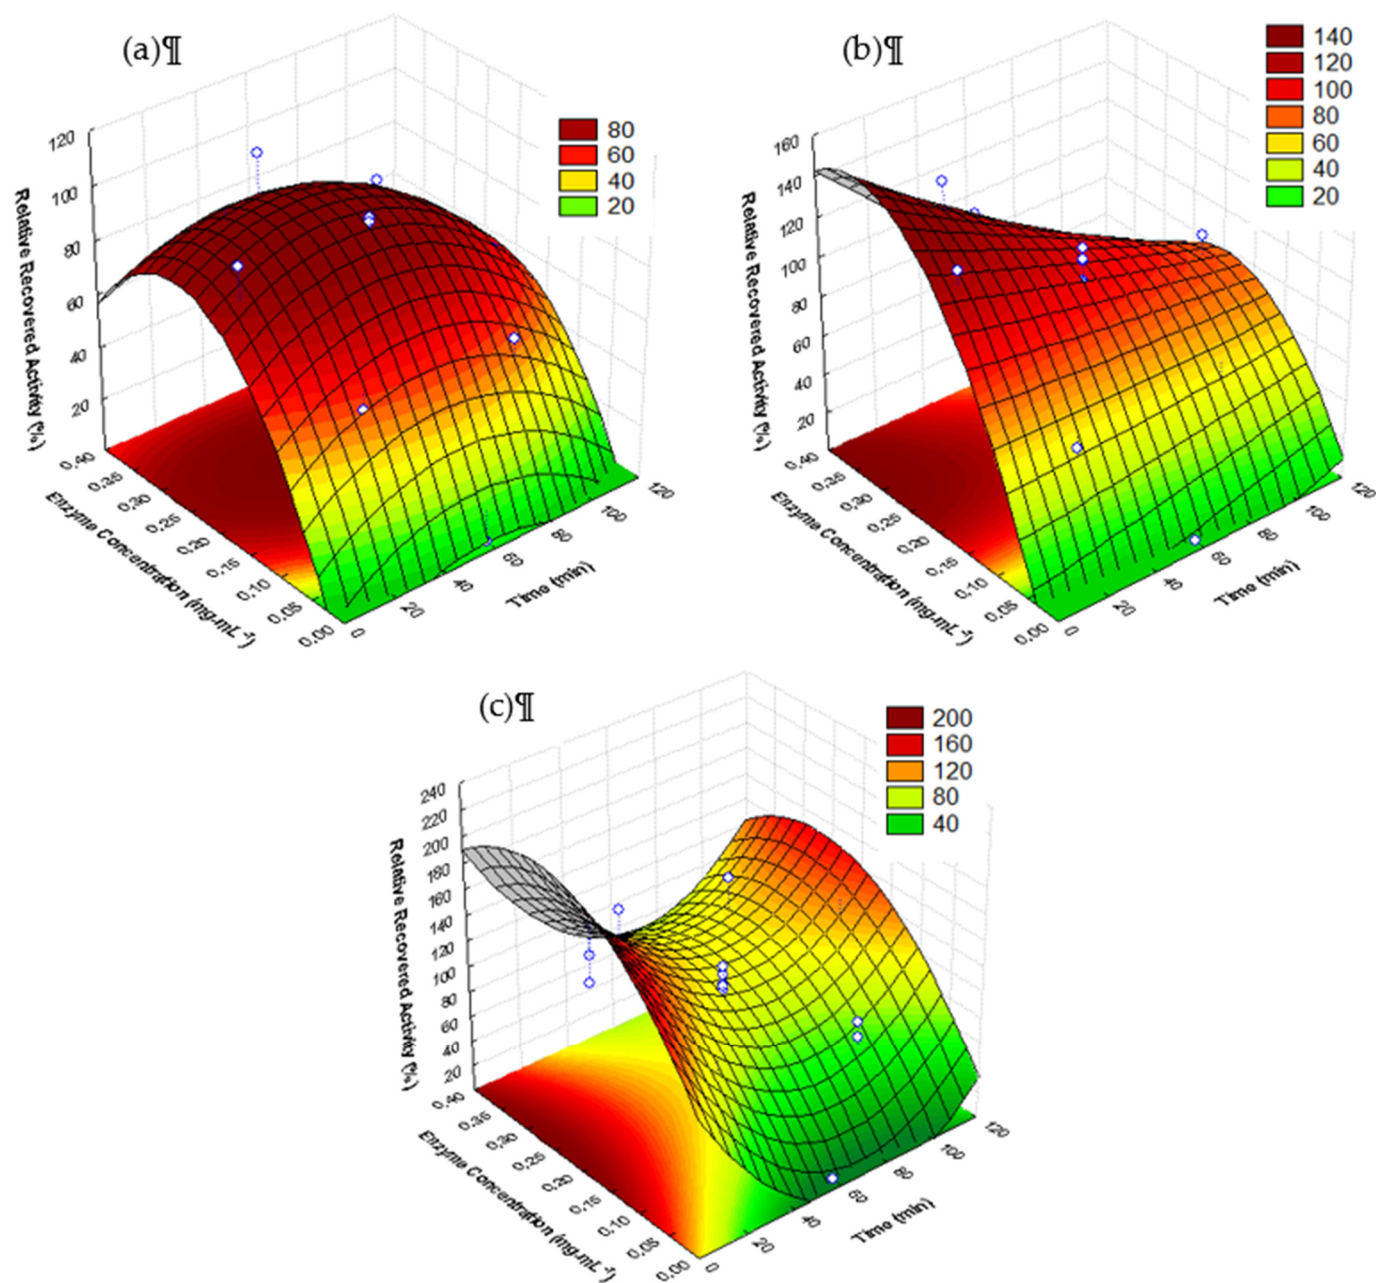

**Figure S3.** Response surface plots for RRA of immobilized ASNase over CX as a function of enzyme concentration and time, at pH 6. (a) CX-4; (b) CX-13; (c) CX-30.

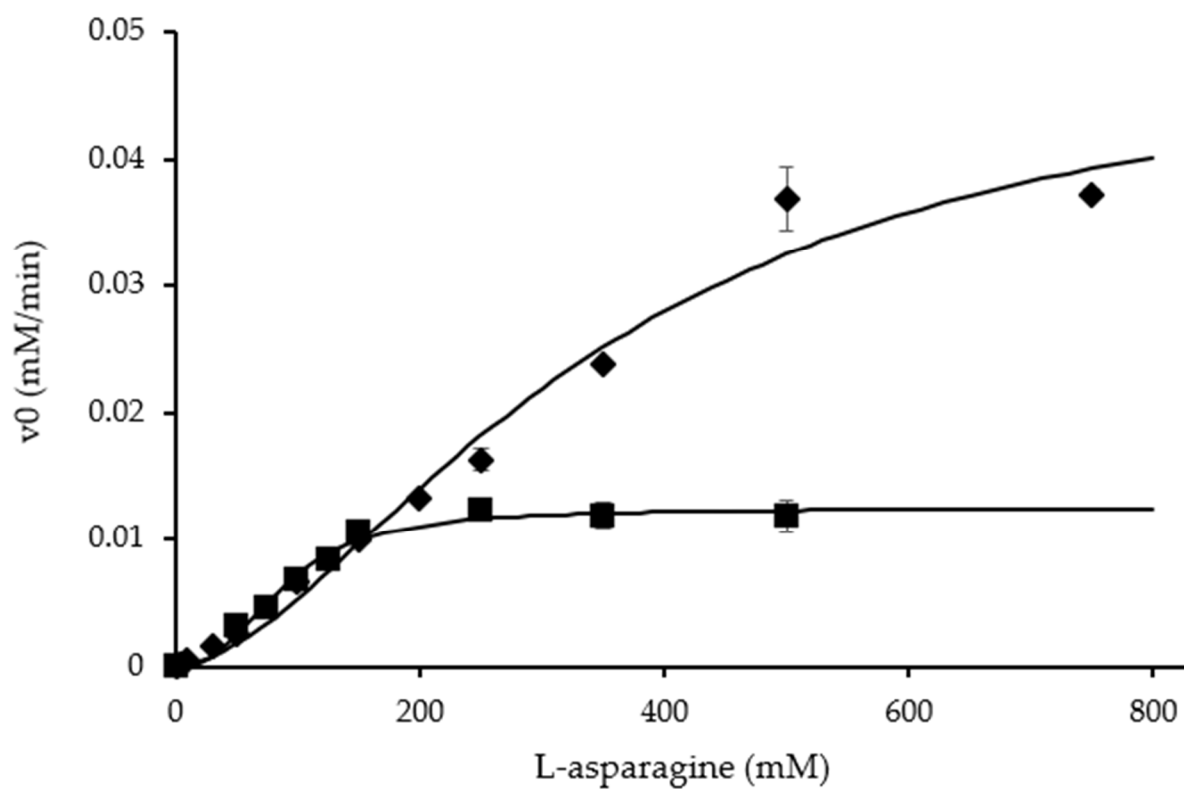

**Figure S4.** Initial reaction rates ( $v_0$ ) for free (♦) and immobilized ASNase (■) ( $0.26 \text{ mg}\cdot\text{mL}^{-1}$ ) onto CX-4 by physical adsorption. The solid lines represent the experimental data fit to the Hill equation.
